# Supplementary material for: The Combined Effect of Common Genetic Risk Variants on Circulating Lipoproteins Is Evident in Childhood: A Longitudinal Analysis of the Cardiovascular Risk in Young Finns Study
Source: PubMed Central journal article supplement (PMC4701181; doi:10.1371/journal.pone.0146081), 2016-01-05
Supplement: pone.0146081.s006.pdf [file pone.0146081.s006.pdf]

| Adult LDL-C model (N=2100)                         | AIC/BIC   | $\beta$ (se)*, p-val                                             |
|----------------------------------------------------|-----------|------------------------------------------------------------------|
| <b>Model 1 :</b>                                   | 3686/3716 | $\beta_{wGRS-LDL}$ : 0.029 (0.02), $p < 2 \times 10^{-16}$ *     |
| Adult.LDL ~ sex+ adult.age+ wGRS-LDL+ $\Delta$ BMI |           | $\beta_{\Delta_{BMI}}$ : 0.09 (0.01), $p = 1.3 \times 10^{-6}$ * |
| + wGRS-LDL* $\Delta$ BMI                           |           | $\beta_{wGRS-LDL * \Delta_{BMI}}$ : -0.02(0.01), $p = 0.15$      |

|                                                   |           |                                                                 |
|---------------------------------------------------|-----------|-----------------------------------------------------------------|
| <b>Model 2:</b>                                   | 3685/3723 | $\beta_{wGRS-LDL}$ : 0.20 (0.02), $p < 1 \times 10^{-16}$ *     |
| Adult.LDL ~ sex+ adult.age+wGRS-LDL+ $\Delta$ BMI |           | $\beta_{\Delta_{BMI}}$ : 0.09(0.02), $p < 1.0 \times 10^{-7}$ * |

### Likelihood Ratio Test : Model 1 vs model 2

$\chi^2(df=1) = 2.04$   $p = 0.15$

| Adult HDL-C model (N=2034)                       | AIC/BIC | $\beta$ (se)*, p-val                                           |
|--------------------------------------------------|---------|----------------------------------------------------------------|
| <b>Model 3 :</b>                                 | 486/418 | $\beta_{wGRS-HDL}$ : 0.06(0.007), $p < 2 \times 10^{-16}$ *    |
| Adult.HDL ~ sex+adult.age+wGRS-HDL+ $\Delta$ BMI |         | $\beta_{\Delta_{BMI}}$ : -0.09 (0.007), $p = 0.046$ *          |
| + wGRS-HDL* $\Delta$ BMI                         |         | $\beta_{wGRS-HDL * \Delta_{BMI}}$ : -0.003 (0.006), $p = 0.62$ |

|                                                  |         |                                                                 |
|--------------------------------------------------|---------|-----------------------------------------------------------------|
| <b>Model 4:</b>                                  | 488/525 | $\beta_{wGRS-HDL}$ : 0.06 (0.007), $p < 1 \times 10^{-16}$      |
| Adult.HDL ~sex+adult.age +wGRS-HDL+ $\Delta$ BMI |         | $\beta_{\Delta_{BMI}}$ : - 0.09 (0.07), $p < 2 \times 10^{-16}$ |

### Likelihood Ratio Test: Model 3 vs model 4

$\chi^2(df=1) = 0.24$   $p = 0.62$

| Adult triglycerides model (N=2062)                | AIC/BIC   | $\beta$ (se)*, p-val                                             |
|---------------------------------------------------|-----------|------------------------------------------------------------------|
| <b>Model 5 :</b>                                  | 2645/2876 | $\beta_{wGRS-TG}$ : 1.029 (0.02), $p < 2 \times 10^{-8}$ *       |
| Log(Adult.TG)~sex+adult.age+wGRS-TG+ $\Delta$ BMI |           | $\beta_{\Delta_{BMI}}$ : 1.09 (0.01), $p = 2.1 \times 10^{-5}$ * |
| wGRS- TG* $\Delta$ BMI                            |           | $\beta_{wGRS-TG * \Delta_{BMI}}$ : 1.002(0.01), $p = 0.3$        |

|                                                   |           |                                                                  |
|---------------------------------------------------|-----------|------------------------------------------------------------------|
| <b>Model 6:</b>                                   | 3685/3723 | $\beta_{wGRS-TG}$ : 1.029 (0.02), $p < 1 \times 10^{-8}$ *       |
| Log(Adult.TG)~sex+adult.age+wGRS-TG+ $\Delta$ BMI |           | $\beta_{\Delta_{BMI}}$ : 1.08 (0.01), $p < 1.0 \times 10^{-9}$ * |

### Likelihood Ratio Test : Model 5 vs model 6

$\chi^2(df=1) = 1.17$   $p = 0.11$
